# Supplementary material
Source: Research Square preprint supplement (doi:10.21203/rs.3.rs-9084247/v1)
Supplement: Supplementary file 1 [file 5d27a627e1036d602880bc45.pdf]

Table S1. Markers of the Senescence-associated Secretory Phenotype (SASP) queried by cBioPortal in our virtual study.

|                                                                                      |                                                                            |                                                                                                                                                                                      |
|--------------------------------------------------------------------------------------|----------------------------------------------------------------------------|--------------------------------------------------------------------------------------------------------------------------------------------------------------------------------------|
| <b>Regulation of the cell cycle</b>                                                  | <b>DNA damage response and repair</b>                                      | <b>Inflammatory response and cytokines</b>                                                                                                                                           |
| CDKN1A, CDKN2A                                                                       | ATM, TP53, CHEK2, PPP1R12A                                                 | IL6, IL7, CXCL8, IL1B, IL13, IL15, CXCL1, CCL13, CCL3, CCL20, CCL16, CCL11, CCL24, CCL26, CCL25, CXCL5, CCL1, CXCL11, TGFB1, TGFB2, TGFB3, CSF2, CSF3, IFNG, CXCL13, MIF, AREG, NRG1 |
| <b>Growth factors</b>                                                                | <b>Insulin-like growth factor-binding proteins</b>                         | <b>Matrix metalloproteinases</b>                                                                                                                                                     |
| EGF, FGF2, HGF, FGF7, VEGFA, VEGFB, VEGFC, VEGFD, PGF, ANG, KITLG, CXCL12, PIGF, NGF | IGFBP2, IGFBP3, IGFBP4, IGFBP6, IGFBP7                                     | MMP1, MMP3, MMP10, MMP12, MMP13, MMP14                                                                                                                                               |
| <b>Tissue inhibitors of metalloproteinases</b>                                       | <b>Serine protease inhibitors</b>                                          | <b>Plasminogen activators and inhibitors</b>                                                                                                                                         |
| TIMP1, TIMP2                                                                         | SERPINE1, SERPINE2                                                         | PLAT, PLAU, PLAUR                                                                                                                                                                    |
| <b>Cathepsins</b>                                                                    | <b>Intercellular adhesion molecules</b>                                    | <b>Tumor necrosis factor receptors</b>                                                                                                                                               |
| CTSB                                                                                 | ICAM1, ICAM3                                                               | TNFRSF10D, TNFRSF11B, TNFRSF1A, TNFRSF1B, TNFRSF10C                                                                                                                                  |
| <b>Transcription factors and regulatory proteins</b>                                 | <b>Other receptors and proteins</b>                                        |                                                                                                                                                                                      |
| BHLHE40, MECP2                                                                       | SA $\beta$ G, FAS, IL6ST, EGFR, FN1, HMGA1, HMGA2, CBX5, CBX1, CBX3, LMNB1 |                                                                                                                                                                                      |

Table S2. Changes across malignancy grades and between LGG and HGG grade groups.

*Contingency Tables*

| Altered | GRADE |     |     |       | Total |
|---------|-------|-----|-----|-------|-------|
|         | I     | II  | III | IV    |       |
| 0       | 7     | 330 | 232 | 466   | 1,035 |
| 1       | 0     | 337 | 408 | 1,540 | 2,285 |
| Total   | 7     | 667 | 640 | 2,006 | 3,320 |

Note. Each cell displays the observed counts

*Chi-Squared Tests*

|                | Value | df | p      |
|----------------|-------|----|--------|
| X <sup>2</sup> | 186.3 | 3  | < .001 |
| N              | 3,320 |    |        |

Note. Continuity correction is available only for 2x2 tables.

*Contingency Tables*

| Altered | GRADE GROUP |        | Total |
|---------|-------------|--------|-------|
|         | I&II        | III&IV |       |
| 0       | 337         | 698    | 1,035 |
| 1       | 337         | 1,948  | 2,285 |
| Total   | 674         | 2,646  | 3,320 |

*Note.* Each cell displays the observed counts

*Chi-Squared Tests*

|                | Value | df | p      |
|----------------|-------|----|--------|
| X <sup>2</sup> | 139.7 | 1  | < .001 |
| N              | 3,320 |    |        |

*Odds Ratio*

|                     | Odds Ratio | 95% Confidence Intervals |       | p      |
|---------------------|------------|--------------------------|-------|--------|
|                     |            | Lower                    | Upper |        |
| Odds ratio          | 2.791      | 2.345                    | 3.321 |        |
| Fisher's exact test | 2.790      | 2.335                    | 3.334 | < .001 |
